# Supplementary material for: Gene Expression Analysis of Astrocyte and Microglia Endocannabinoid Signaling during Autoimmune Demyelination
Source: MDPI journal article supplement (doi:10.3390/biom10091228), 2020-08-24
Supplement: s1 [file s1]

**Supplementary Figure 1.** FACS sorting and purity of CNS cell populations during EAE.

(A-B) Representative dot-plots depicting FACS strategy for the purification of astrocytes and microglia from EAE mice. Astrocytes were sorted as ACSA-2<sup>+</sup> cells following exclusion of contaminating hematopoietic cells (CD45<sup>+</sup>), microglia/macrophages and hematopoietic cells (CD11b<sup>+</sup>/CD45<sup>+</sup>), oligodendrocytes (O1<sup>+</sup>), oligodendrocyte progenitors (A2B5<sup>+</sup>) and endothelial cells (CD31<sup>+</sup>) grouped in a dump channel. *Right:* The purity of sorted astrocyte population by FACS analysis of the astrocytic marker GLAST. (B) Microglial cells were sorted as CD11b positive cells with low CD45 expression (CD11b<sup>+</sup>/CD45<sup>low</sup>). (C) qPCR analysis of astrocyte (*Aldh1l1*, *Aqp4*, *Atp1b2*, *Gfap*, *Slc1a3*) and microglia (*Gpr34*, *Itgam*, *P2ry12*, *Tmem119*) enriched genes in both cell types purified at acute EAE disease ( $n = 5-6$  mice; normalized to astrocytic *Gfap*).

**Supplementary Figure 2.** Cell-population analysis during EAE. (A) Clinical score of the diseased animals used in the study ( $n = 19$  mice; 2 independent EAE experiments).

Astrocytes and microglia were sorted from control and immunized mice at the presymptomatic (7-8 dpi), acute (14-17 dpi) and recovery (28-31 dpi). (B) Neurological score of the diseased mice used for FACS analysis at each time-point ( $n = 6$  mice). \*\*\* $p < 0.001$ ; one-way ANOVA followed by Newman-Keuls tests. (C) Relative abundance of CD11b<sup>+</sup>CD45<sup>high</sup> and CD11b<sup>-</sup>CD45<sup>high</sup> peripheral immune cell populations in CNS single-cell suspensions from control and EAE mice at presymptomatic, acute and recovery phases of the disease ( $n = 6-8$  mice per condition). \*\*\* $p < 0.001$  referred to CD11b<sup>+</sup> cells, Student's *t*-tests.
