# Supplementary figures and images for: Gene Expression Analysis of Astrocyte and Microglia Endocannabinoid Signaling during Autoimmune Demyelination
Source: MDPI journal article supplement (doi:10.3390/biom10091228), 2020-08-24

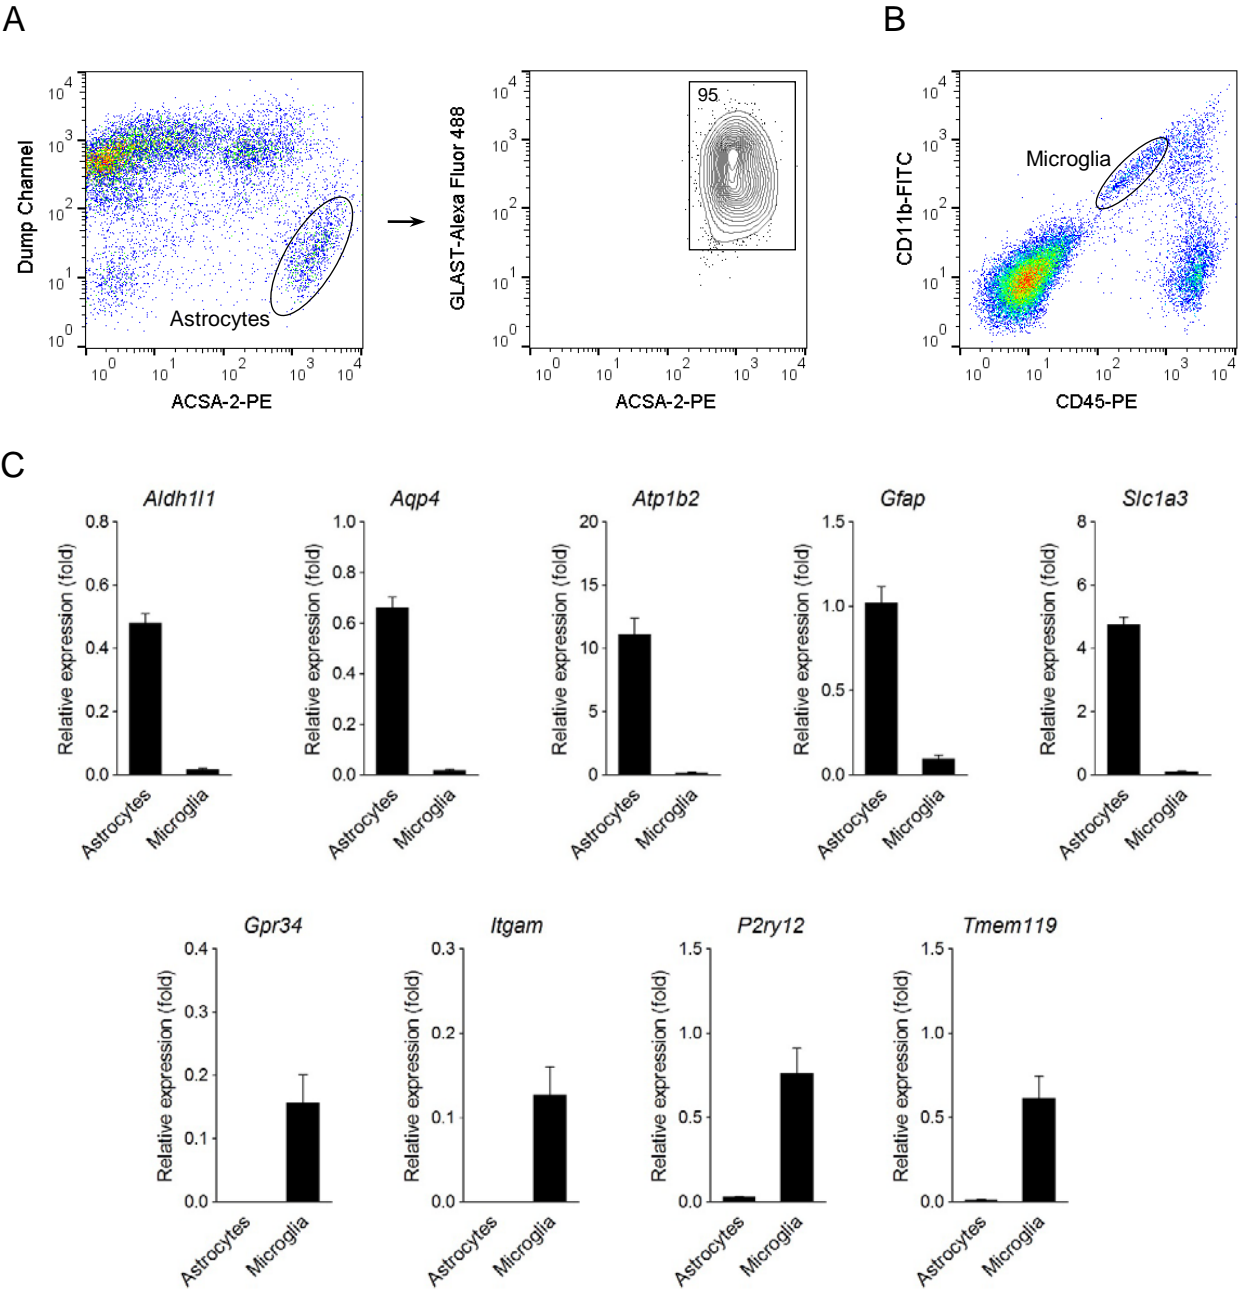

Supplementary Figure 1

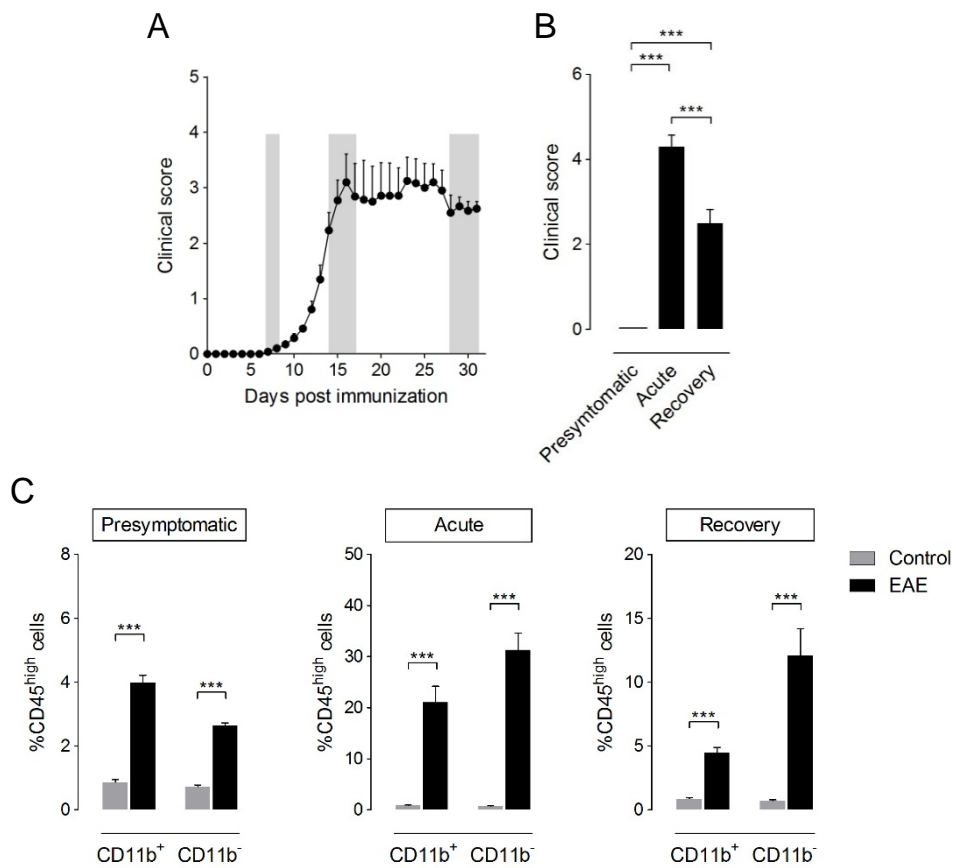

**Supplementary Figure 2**

Supplement: s1 [file s1]
